# Enhanced processing of aversive stimuli on embodied artificial limbs by the human amygdala

1 Antonin Fourcade<sup>1,2,3,4\*</sup>, Timo Torsten Schmidt<sup>1</sup>, Till Nierhaus<sup>1</sup>, Felix Blankenburg<sup>1</sup>

2 <sup>1</sup>Neurocomputation and Neuroimaging Unit, Department of Education and Psychology, Freie  
3 Universität Berlin, Berlin, Germany

4 <sup>2</sup>Max Planck School of Cognition, Max Planck Institute for Human Cognitive and Brain Sciences,  
5 Leipzig, Germany

6 <sup>3</sup>MindBrainBody Institute, Berlin School of Mind and Brain, Humboldt-Universität zu Berlin, Berlin,  
7 Germany;

8 <sup>4</sup>Charité - Universitätsmedizin Berlin, Germany;

9 \* **Correspondence:**

10 Corresponding Author

11 [antonin.fourcade@maxplanckschools.de](mailto:antonin.fourcade@maxplanckschools.de)

## 12 **Abstract**

13 Body perception has been extensively investigated, with one particular focus being the integration of  
14 vision and touch within a neuronal body representation. Previous studies have implicated a distributed  
15 network comprising the extrastriate body area (EBA), posterior parietal cortex (PPC) and ventral  
16 premotor cortex (PMv) during illusory self-attribution of a rubber hand. Here, we set up a fMRI  
17 paradigm in virtual reality (VR) to study whether and how threatening (artificial) body parts affects  
18 their self-attribution. Participants (N=30) saw a spider (aversive stimulus) or a toy-car (neutral  
19 stimulus) moving along a 3D-rendered virtual forearm positioned like their real forearm, while tactile  
20 stimulation was applied on the real arm in the same (congruent) or opposite (incongruent) direction.  
21 We found that the PPC was more activated during congruent stimulation; higher visual areas and the  
22 anterior insula (aIns) showed increased activation during aversive stimulus presentation; and the  
23 amygdala and pregenual anterior cingulate cortex (ACC) were more strongly activated for aversive  
24 stimuli when there was stronger multisensory integration of body-related information (interaction of  
25 aversiveness and congruency). Together, these findings suggest an enhanced processing of aversive  
26 stimuli within the amygdala when they represent a threat to body integrity.

27

28

## 29 **1 Introduction**

30 In an iconic scene of the classic James Bond movie *Dr. No* (1962), the spy is shown taking a well-  
31 deserved rest in his bed when he suddenly feels a surprising touch on his upper arm. He slowly turns  
32 his head toward the source of this unexpected sensation and sees a tarantula crawling onto his shoulder,  
33 and as the fear sets in, beads of sweat form on his forehead as the spider crawls closer and closer to his  
34 head. What leads Bond to break out in a sweat is not just the threat of a spider, but that this spider is  
35 directly compromising his body integrity. How does he infer that what he sees, the spider, is also  
36 stimulating what he feels on his arm? This is a classic example of multisensory integration, i.e., stimuli  
37 registered by distinct modalities (e.g., sight and touch) are inferred to be caused by the same source,  
38 i.e., the spider on the skin<sup>1-3</sup>. These inference and integration processes are highly plastic, and research  
39 on body ownership has explored how even body representations can be influenced and adjusted  
40 depending on incoming (multi-)sensory information<sup>4,5</sup> using the Rubber Hand Illusion<sup>6,7</sup> (RHI). The  
41 RHI is induced when the rubber hand and the participant's real hand (hidden from sight) are stroked in  
42 a temporally and spatially congruent manner<sup>8,9</sup>. The visual and tactile information are integrated in the  
43 brain, while the incoming proprioceptive information from the real hand is seemingly down-weighted,  
44 resulting in the illusion that the rubber hand is actually part of the participant's body. Functional  
45 neuroimaging studies using the RHI have revealed a brain network<sup>10,11</sup>, comprising the body-selective  
46 extrastriate body area (EBA), posterior parietal cortex (PPC), and ventral premotor cortex (PMv),  
47 which is thought to integrate sensory information in order to recalibrate peripersonal space<sup>12-14</sup>, to  
48 support action<sup>15,16</sup>. The RHI paradigm has also been used to investigate how emotion processing,  
49 related to threat, interacts with the illusory self-attribution of the fake hand. Ehrsson and colleagues  
50 (2007) showed that the anterior insula (aIns) and the anterior cingulate cortex (ACC), which are part  
51 of an interoceptive network implicated in physiological and emotional processing<sup>17,18</sup>, were activated  
52 when the rubber hand was threatened with a needle while participants experienced the RHI, and that  
53 activation in these regions was correlated with participants' subjective ratings of ownership. The  
54 researchers posited that the involvement of interoceptive brain regions during the RHI may add to the  
55 vividness of the body ownership experience by drawing on emotions as well<sup>19</sup>. However, it is yet not  
56 well understood how the multisensory integration underlying the sense of body ownership may mediate  
57 emotion - especially at an early phase of this integration, before the full onset of the actual illusion is  
58 experienced<sup>8</sup>. Another key brain region involved in emotional and sensory processing is the amygdala,  
59 known for its role in processing fear and emotional salience of external stimuli<sup>20</sup>. Peelen and colleagues  
60 (2007) showed that the activity of the EBA was modulated by the emotional significance of body  
61 postures, and that the activation of the amygdala was correlated with this modulation, implicating the  
62 amygdala in body-related emotional processing. However, whether activation of the amygdala is  
63 modulated by the self-relevance of body parts - i.e., their self-attribution or "embodiment" - in the  
64 presence of an aversive stimulus remains an open question. And more generally, it is unclear how the  
65 brain processes emotionally loaded visuo-tactile stimuli that are related to a self-attributed body part,  
66 as compared to a non-self-attributed one.

67 Recently, virtual reality (VR) has emerged as a new tool to advance the investigation of both body  
68 ownership and emotion processing. The brain's flexibility in representing body ownership has been  
69 emphasized by studies using the RHI paradigm in VR<sup>9</sup>, as well as studies investigating a whole-body  
70 transfer illusion<sup>22,23</sup>. VR also provides greater ecological validity<sup>24,25</sup>; researchers are able to create  
71 more contextualized and realistic experiences, while still maintaining experimental control. Indeed,  
72 experiments using VR have shown that the elicitation of emotions is stronger when participants were  
73 more immersed in virtual environments<sup>26-28</sup>. Following this, stereoscopic rendering via MRI-

74 compatible VR goggles has been shown to be more immersive than the presentation of 2D stimuli<sup>29</sup>  
75 and a recent study on emotion regulation that combined VR and functional neuroimaging found  
76 activation of the amygdala when participants were immersed in an “anguish” virtual environment<sup>30</sup>.  
77 Altogether, VR gives a unique opportunity to investigate the early phase of the multisensory integration  
78 underlying the RHI in the presence of emotional stimuli, while being able to record brain activity with  
79 fMRI.

80 Here we intended to investigate the relevance of emotional processing for body integrity; by focusing  
81 on the neuronal correlates of processing aversive vs neutral stimuli on embodied (artificial) limbs.  
82 Specifically, we aimed our VR paradigm at extending the available methods of investigating  
83 multimodal integration in a controlled manner<sup>9,22,23</sup> while also adding an affective component to the  
84 stimulus: aversiveness<sup>31</sup>. We designed an experiment in which we manipulated the congruency of  
85 visuo-tactile stimulation (congruent vs. incongruent) on a participant’s arm and the aversiveness of the  
86 stimuli (aversive versus neutral). Based on the RHI literature, we hypothesized that a similar network  
87 of regions, comprising the EBA, PCC, and PMv, will be activated for the integration of visual and  
88 tactile information. Secondly, considering the literature on emotion processing, we speculated that the  
89 aIns, ACC, and amygdala would show increased activation during the presentation of an aversive  
90 stimulus, as compared to a neutral one. Finally, we postulated that the amygdala, the aIns and the ACC  
91 would show an interaction effect, such that congruent-aversive stimulation will elicit higher activations  
92 than other stimulus pairings.

## 93 **2 Methods**

94 Participants underwent an fMRI scanning session followed by a retrospective questionnaire on their  
95 subjective body ownership experience and their emotional response to the stimuli. During scanning,  
96 participants were presented with visual moving objects, in both directions, on a 3D-rendered virtual  
97 forearm presented like their real arm, while tactile electric stimulation was applied congruently or  
98 incongruently to the visual stimulation. The moving objects were either aversive stimuli (spider) or  
99 neutral objects (toy car). Thus, the experimental design comprised a  $2 \times 2 \times 2$  factorial design with  
100 congruency, aversiveness, and direction of visual motion (left and right) as independent factors.

### 101 **2.1 Participants**

102 Thirty-three healthy participants (age range: 19-36 years; 20 females; all right-handed, i.e., mean  
103 Laterality Quotient = 90 as assessed with the Edinburgh Handedness Inventory<sup>32</sup>; normal or corrected-  
104 to-normal vision) participated in the experiment. Three participants’ datasets were excluded due to  
105 inattentiveness during the control task (see below), resulting in  $N = 30$  datasets used for the analysis.  
106 All participants gave written informed consent before the experiment. The study was approved by the  
107 local Ethical Committee of Freie Universität Berlin and conducted in accordance with this approval  
108 and the relevant guidelines and regulations.

### 109 **2.2 Experimental set-up**

110 The participant’s right arm was placed horizontally across the chest using pillows for support, in a  
111 position corresponding to the presentation of the virtual arm. To ensure that the location of visual  
112 stimuli in eye-centered coordinates remained the same, participants were instructed to fixate a small  
113 red dot in the middle of the virtual forearm (and center of the virtual field of view) throughout the  
114 whole experiment. For full, direct vision of the virtual arm, the participant’s head was slightly tilted  
115 down towards the chest within the head coil (approx.  $20\text{-}30^\circ$ ), and the head and neck were supported  
116 with foam padding. Stereoscopic goggles were attached both to the participant’s forehead and to the

117 head coil with Velcro strips to minimize motion during the experiment. The participant's real arm was  
118 completely occluded from view by the goggles. A fiber optic response button box (fORP, Current  
119 Designs, Philadelphia, PA) was placed in the left hand.

### 120 **2.2.1 Paradigm**

121 There was a total of eight trial types (Congruent vs. Incongruent  $\times$  Aversive vs. Neutral  $\times$  Left vs. Right  
122 visual motion). Within each of the six runs, each condition was presented six times (i.e., 48 trials per  
123 run). Additionally, one attentional control trial, where the fixation dot briefly blinked (50-ms on/off  
124 period), was presented per condition and run (i.e., 8 trials per run); participants were instructed to  
125 respond to the blinking fixation dot with a button press. This resulted in a total of 56 trials per run and  
126 336 trials overall. Trials were randomized within each run. Each trial was two seconds long, followed  
127 by a jittered inter-trial interval of two to six seconds (approx. 7-min per run).

### 128 **2.2.2 Virtual Reality**

129 Digital stereoscopic goggles (VisuaSTIM, 800x600 pixels, 30° eye field) and PsychToolbox 3.0.14  
130<sup>33,34</sup> with MATLAB 2016a 64bit (Mathworks, Massachusetts) were used to present a photorealistic  
131 3D-rendered virtual arm in a plausible posture with respect to the real arm (i.e., an anatomically  
132 plausible configuration and location in space), with the hand palm down and in a fist (see Figure 1B).

133 The stimulus presentation computer was equipped with a NVidia GeForce GTX 750Ti graphic card  
134 with two display outputs (one for each eye). For each condition, stereoscopic videos were created with  
135 the Unity3D 2017 software package (Unity Technologies, California) and 3D assets available on the  
136 Unity Store (<https://assetstore.unity.com>). The aversive and neutral stimuli were designed to be as  
137 matched as possible, e.g. with the same size, moving speed and starting/end point. However, the legs  
138 of the spider were moving to simulate crawling, while the shape of the car was not changing. The  
139 background of the videos consisted of a neutral room with a bench, a cabinet and a ceiling light, as  
140 well as the virtual right arm with a red dot in the middle (see Figure 1A). In Unity3D, the distance  
141 between the two recording cameras simulating both eyes (and generating the stereoscopic videos) was  
142 set to the mean adult interpupillary distance of 63mm<sup>35</sup> to create a 3D effect.

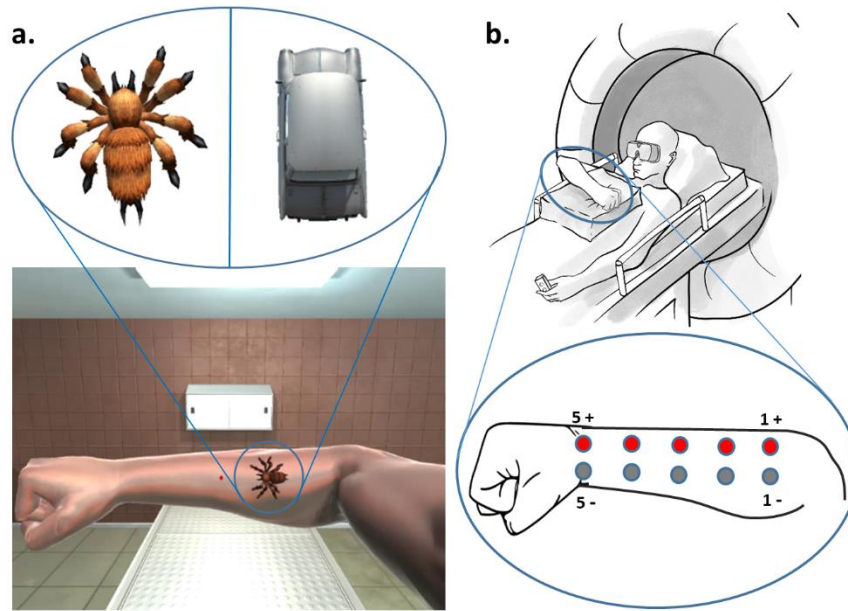

143

144 **Figure 1. a.** Image of the virtual environment seen by the participants. Only the right-eye view is  
145 shown. Stimuli used for aversive (spider) and neutral (car) conditions. The red fixation dot at the center  
146 of the forearm blinked briefly during attentional control trials. **b.** Details of the set-up inside the MRI  
147 room. Five pairs of surface-adhesive electrodes were positioned on the lateral side of the right forearm,  
148 from the wrist to the elbow, to enable five stimulation sites. The right arm was placed horizontally on  
149 top of the participant's chest using pillows, fist closed. The left hand was holding the response button  
150 box with the arm along the body. The head was slightly tilted in the direction of the chest within the  
151 head coil (approx. 20-30°). Stereoscopic goggles were attached to the participant's forehead and the  
152 head coil (not shown) with Velcro strips to minimize motion.

### 153 2.2.3 Electrostimulation

154 Prior to the scanning, five pairs of surface-adhesive electrodes were positioned on the lateral side of  
155 the right forearm, from the wrist to the elbow (see Figure 1B). A constant current neurostimulator  
156 (DS7A, Digitimer, Hertfordshire, United Kingdom) was used to deliver electrical pulses (square wave,  
157 0.2-ms duration) to the five stimulation sites. During the experiment, the same stimulus intensity was  
158 used for all sites. Electrode positions were adjusted individually so that the pulses from each electrode  
159 had comparable intensity and could be spatially discriminated, without producing discomfort, radial  
160 stimulation, or muscle contractions. An 8-channel relay card (RX08-LPT, GWR Elektronik) was used  
161 to control the administration of pulses. The relay card was operated with MATLAB via the parallel  
162 port (LPT) of the computer. Five pulses were always delivered sequentially (500-ms delay) and could  
163 start at either the left (wrist) or right (elbow) electrode.

### 164 2.2.4 fMRI data acquisition

165 The experiment was conducted on a 3 Tesla scanner (Tim Trio, Siemens, Germany) equipped with a  
166 12-channel head coil. T2\*-weighted images were acquired using a gradient echo-planar imaging  
167 sequence ( $3 \times 3 \times 3$  mm voxels, 20% gap, matrix size =  $64 \times 64$ , TR = 2000ms, TE = 30ms, flip angle  
168 = 70°). Six runs with 176 functional volumes each were recorded for each participant. After the



169 functional runs, a gradient-echo (GRE) field map ( $3 \times 3 \times 3$  mm voxels, TR = 488ms, TE1 = 4.92ms,  
170 TE2 = 7.38ms, 20% gap, flip angle =  $60^\circ$ ), and a high-resolution T1-weighted structural image was  
171 acquired for each participant (3D MPRAGE, voxel size =  $1 \times 1 \times 1$  mm, FOV =  $256 \times 256$  mm, 176  
172 slices, TR = 1900ms, TE = 2.52ms, flip angle =  $9^\circ$ ).

### 173 **2.2.5 Data preprocessing and analysis**

174 Data were processed and analyzed using SPM12 (Wellcome Department of Cognitive Neurology,  
175 London, UK: [www.fil.ion.ucl.ac.uk/spm/](http://www.fil.ion.ucl.ac.uk/spm/)). Images were realigned to the first image of each run to  
176 correct for head motion. Each participant's structural image was co-registered with the realigned  
177 functional images, and segmented into white matter (WM), gray matter (GM), and cerebrospinal fluid  
178 (CSF). Functional images were spatially normalized to the MNI space using DARTEL<sup>36</sup> and spatially  
179 smoothed by an isotropic Gaussian kernel of 8 mm full width at half maximum. Data were detrended  
180 using a linear mean global signal removal script<sup>33</sup>. To reduce physiological and systemic noise in the  
181 functional data, the first five principal components accounting for the most variance in the CSF and  
182 WM signal time-courses, respectively, and the six realignment parameters, were added to the first-level  
183 general linear models (GLMs) as regressors of no interest<sup>37</sup>. Each trial type was modeled as a regressor  
184 with a boxcar function (2-s duration) and convoluted with the standard hemodynamic response function  
185 from SPM. Attentional control trials were not included.

186 Thus, on the first level, the eight trial types (Congruency  $\times$  Aversiveness  $\times$  visual motion Direction)  
187 were modelled as regressors, as well as the five CSF/WM components and the six motion parameters,  
188 resulting in 19 regressors. To estimate the effects of the conditions of interest (i.e., Congruency  $\times$   
189 Aversiveness), left and right visual motion direction trials were pooled across each of the conditions,  
190 resulting in four t-contrasts for each participant. On the second level, the first-level t-contrasts were  
191 used to perform a  $2 \times 2$  ANOVA with Congruency (2 levels: Congruent, Incongruent) and  
192 Aversiveness (2 levels: Aversive, Neutral) as factors. As covariate, the z-scored aversiveness index for  
193 each participant was entered as a parametric regressor: within each participant, the ratings  
194 “uncomfortable” and “scared” (see *Behavioral data*) was averaged separately for the aversive and  
195 neutral stimuli, then the average of all the participant's ratings (“uncomfortable” and “scared” together)  
196 was subtracted to them, resulting in two scores per participant, and these scores were considered the  
197 same for the congruent and incongruent condition.

198 Predefined ROI masks for the bilateral amygdala, insula and ACC were created using the SPM  
199 Anatomy toolbox v3.0<sup>38</sup>. Because no atlas includes a map specifically for EBA and PMv, a 10 mm  
200 radius spherical ROI was created, centered on coordinates reported in an independent study (left EBA,  
201  $x = -50$ ,  $y = -74$ ,  $z = 6$ ; right EBA,  $x = 54$ ,  $y = -68$ ,  $z = 2$ ; left PMv,  $x = -52$ ,  $y = 8$ ,  $z = 28$ ; right PMv,  
202  $x = 52$ ,  $y = 10$ ,  $z = 32$ ; Limanowski and Blankenburg, 2015).

203 Additionally, as an ad-hoc investigation, we looked at activations reflecting both the participants  
204 subjective ratings and the aversiveness of the stimuli. To this end, we created a mask based on the  $p <$   
205 .001 voxels from the aversive vs. neutral contrast and applied it to the parametric aversiveness index  
206 contrast.

### 207 **2.2.6 Behavioral data**

208 During the scan, button presses were recorded and  $d'$  was calculated as an index of maintained  
209 attention. Hits were defined as a button response during an attentional control trial; false alarms as a  
210 button response during test trials. Perfect rates ( $p_{\text{hits}} = 1$  or  $p_{\text{false alarms}} = 0$ ) were corrected according to  
211 the  $1/2N$  rule<sup>39,40</sup>

212 After the scan, participants were asked to fill out a 15-item questionnaire measuring participants'  
213 subjective ratings of the congruency and aversiveness of the stimuli. To validate that participants  
214 perceived the visual and tactile stimuli as temporally aligned, they were asked “Was the visual moving  
215 object synchronized to the tactile stimulation?” The questionnaire also inquired whether participants  
216 could differentiate between congruent and incongruent visual-tactile stimulation (“Was the tactile  
217 stimulation for some trials going the same/opposite direction as the visual moving object?”). To assess  
218 the degree to which participants might have experienced the “ownership illusion,” they were asked to  
219 rate the following statements (based on <sup>6,10</sup>), for both congruent and incongruent visual-tactile  
220 stimulation: “I felt as if I was looking at my own arm and hand;” “I felt as if the virtual arm and hand  
221 was part of my body;” “I felt as if the virtual arm and hand were my arm and hand.” Body Ownership  
222 scores for congruent and incongruent trials were then calculated separately by averaging the ratings.  
223 Finally, aversiveness of the spider and car were assessed by asking “Did the moving object make you  
224 feel uncomfortable/scared/pleased?” Each item was rated on a seven-point Likert scale ranging from  
225 “not at all” (0) to “definitely yes” (6).

## 226 **3 Results**

### 227 **3.1 Behavioral results**

228 To test for continuous task performance, a one-way ANOVA was performed with Run as a factor with  
229 six levels. Participants’ attention, as indexed by  $d'$ , ranged from 0 (0% hits, 0% false alarms) to 3.07  
230 (100% hits, 0% false alarms) per run. Across participants,  $d'$  did not significantly differ between runs,  
231  $F(5,179) = 0.18$ ,  $p = .27$ . Each participant’s mean  $d'$  across runs was calculated and an exclusion  
232 criterion of mean  $d' = 1.66$  (55% hits, 0% false alarms) was set. Three participants were excluded due  
233 to poor performance on the attention task.

234 Ratings on the post-scan questionnaire (ranging from 0 to 6) regarding visuo-tactile experience, body  
235 ownership (congruent vs. incongruent), and stimuli aversiveness (aversive vs. neutral) did not pass  
236 Shapiro-Wilk tests for normality and were therefore analyzed using non-parametric Wilcoxon’s  
237 signed-rank tests with  $\alpha = 0.05$ . Participants reported that they were able to identify that there were  
238 congruent trials (mean = 5.70, STD = 0.99),  $Z = 5.12$ ,  $p < .001$ , and incongruent trials (mean = 5.73,  
239 STD = 0.74),  $Z = 5.15$ ,  $p < .001$ . Tactile stimulation subjectively synchronized with the movement of  
240 the objects (mean = 5.33, STD = 1.18),  $Z = 4.73$ ,  $p < .001$ . Body ownership ratings were higher for  
241 congruent stimulation (mean = 3.12, STD = 1.62) than incongruent stimulation (mean = 2.40, STD =  
242 1.69),  $Z = 3.27$ ,  $p < .001$ . P-values concerning the stimulus aversiveness ratings were corrected for  
243 false discovery rate (FDR); ratings for “uncomfortable” were significantly higher for spider (mean =  
244 2.30, STD = 2.31) than for car (mean = 0.60, STD = 1.07),  $Z = 3.72$ ,  $p < .001$ . Ratings for “scared”  
245 were higher for spider (mean = 1.83, STD = 1.88) than for car (mean = 0.30, STD = 0.79),  $Z = 3.51$ ,  $p$   
246 = .002. Ratings for “pleased” were significantly lower for spider (mean = 0.83, STD = 1.26) than for  
247 car (mean = 1.63, STD = 1.81),  $Z = 2.56$ ,  $p = .0052$ .

### 248 **3.2 fMRI results**

249 First, we performed a whole-brain analysis with family-wise error correction (FWE) at the cluster level  
250 ( $p < .05$ ) using an initial voxel-wise threshold of  $p < .001$ , uncorrected. Following our a priori  
251 hypotheses, we additionally report results at  $p < .001$  uncorrected within predefined regions of interest,  
252 i.e., left/right EBA, left/right PMv, left/right aIns, left/right ACC and left/right amygdala.

### 253 3.2.1 Congruence vs. Incongruence

254 Contrasting congruent versus incongruent stimulation revealed higher activation within the PPC for  
255 congruent compared to incongruent trials. The left superior parietal lobule SPL (area 7A; see Figure  
256 2A and Table 1) showed higher activation in the whole-brain analysis with FWE-correction. When  
257 testing in the a priori defined ROIs, the PMv and EBA showed no significant difference in activation  
258 between trials at a significance threshold of  $p < .001$ .

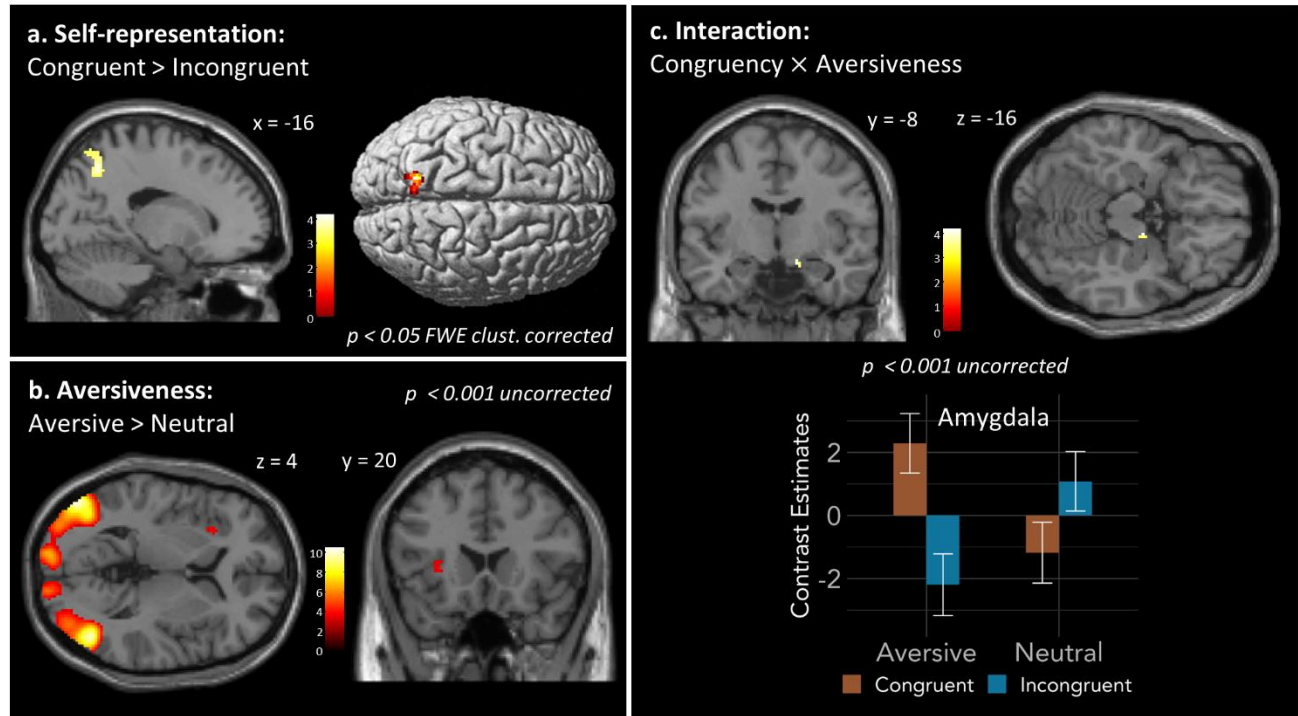

259  
260 **Figure 2. a.** Congruent versus incongruent visual-tactile stimulation produced significant activation  
261 differences in the left SPL (area 7A;  $p < .05$ , FWE corrected on the cluster level). **b.** Aversive versus  
262 neutral stimuli showed significant activation differences in left *Ins* (area *Id7*;  $p < .001$ , uncorrected),  
263 and left and right middle temporal area (LOC/hMT+/V5), left and right V1, and right fusiform gyrus  
264 ( $p < .05$ , FWE corrected on the cluster level). **c.** Interaction Congruency × Aversiveness revealed  
265 activations in right amygdala (area SF;  $p < .001$ , uncorrected) and right pregenual ACC (not shown,  
266  $p = .001$ , uncorrected). Here, activations within anatomical masks of the bilateral amygdala and insula  
267 (SPM Anatomy Toolbox; Eickhoff et al., 2005) are shown. Mean contrast estimates of peak activations  
268 for both regions are plotted; error bars represent standard error.

269



270

**Table 1.**

Significant activation differences obtained from contrasting congruent versus incongruent visual-tactile stimulation, aversive versus neutral conditions, the interaction between congruency and aversiveness, and aversive congruent versus aversive incongruent conditions.

|                                                | MNI coordinates |     |     | $k_E$ | Peak $t$ | Peak $z$ | $p$                 |
|------------------------------------------------|-----------------|-----|-----|-------|----------|----------|---------------------|
|                                                | $x$             | $y$ | $z$ |       |          |          |                     |
| Congruent vs. Incongruent                      |                 |     |     |       |          |          |                     |
| SPL (7A) left                                  | -16             | -60 | 48  | 165   | 4.25     | 4.04     | .033*               |
| Aversive vs. Neutral                           |                 |     |     |       |          |          |                     |
| LOC/hMT+/V5 right                              | 46              | -70 | 0   | 758   | 10.51    | Inf      | < .001*             |
| LOC/hMT+/V5 left                               | -50             | -78 | 4   | 1159  | 10.09    | Inf      | < .001*             |
| V1 right                                       | 12              | -88 | -8  | 270   | 7.94     | 6.86     | < .001*             |
| V1 left                                        | -12             | -98 | 0   | 213   | 7.56     | 6.60     | < .001*             |
| Fusiform gyrus right                           | 36              | -62 | -12 | 119   | 6.23     | 5.64     | < .001*             |
| aIns (Id7) left                                | -30             | 20  | 4   | 18    | 3.63     | 3.49     | < .001 <sup>†</sup> |
| Congruency × Aversiveness                      |                 |     |     |       |          |          |                     |
| amygdala (SF) right                            | 14              | -8  | -16 | 7     | 4.16     | 3.96     | < .001 <sup>†</sup> |
| ACC (pregenual) right                          | 2               | 20  | -2  | 2     | 3.31     | 3.21     | .001 <sup>†</sup>   |
| Aversive-congruent vs.<br>Aversive-incongruent |                 |     |     |       |          |          |                     |
| amygdala (SF) right                            | 16              | -8  | -18 | 18    | 4.00     | 3.82     | < .001 <sup>†</sup> |

*Note.* MNI = Montreal Neurological Institute; SPL = superior parietal lobule;

LOC/V5/hMT+ = middle temporal area; aIns = anterior insula

\* $p$ -value at cluster level with family-wise error correction

<sup>†</sup> $p$ -value at peak level uncorrected within ROI

271

### 272 3.2.2 Aversive vs. Neutral

273 Contrasting *aversive* (spider) versus *neutral* (car) conditions revealed significantly higher activation in  
274 left and right middle temporal area, comprising Lateral Occipital Complex (LOC) and hMT+/V5, as  
275 well as left and right V1, and right fusiform gyrus (FWE corrected; see Figure 2B and Table 1).

276 When testing in the a priori defined ROIs, activation differences were present in the left dorsal aIns  
277 (area Id7;  $p < .001$ , uncorrected; see Figure 2B and Table 1). No activation differences were found in  
278 the amygdala and ACC at a significance level  $> .001$ .

279 Additionally, the masked parametric aversiveness index contrast revealed a cluster of activation ( $p <$   
280  $.001$ , uncorrected;  $T = 3.71$ ;  $Z = 3.57$ ;  $k_E = 10$ ; peak's MNI coordinates:  $x = 46$ ,  $y = -60$ ,  $z = 0$ ) in the  
281 right middle temporal area (LOC).

### 282 3.2.3 Interaction Congruency $\times$ Aversiveness

283 The interaction effect of *Congruency*  $\times$  *Aversiveness* did not reveal any significant clusters of  
284 activation in the whole brain analysis. When testing in the a priori defined ROIs, activation differences  
285 were seen in the right amygdala (superficial area [SF];  $p < .001$ , uncorrected; see Figure 2C and Table  
286 1) and right pregenual ACC (area 33;  $p = .001$ , uncorrected; see Table 1). In the congruent condition,  
287 amygdala activity is higher in the presence of an aversive stimulus (vs. neutral), but in the incongruent  
288 condition, its activity is lower. Moreover, the difference due to congruency is greater for the aversive  
289 condition than the neutral condition. The aIns did not show differences in activation at a significance  
290 level  $> .001$ .

291 Additionally, contrasting *aversive congruent* versus *aversive incongruent* conditions reveal higher  
292 activation in the right amygdala (SF;  $p < .001$ , uncorrected, within ROI; see Table 1), but not in aIns  
293 and ACC.

## 294 4 Discussion

295 In this study, we investigated brain activity of participants experiencing visual stimulation on a VR  
296 arm synchronized with tactile stimulation of the real arm; while the aversiveness of the visual stimuli  
297 was manipulated, as well as the congruency of the visual and tactile stimuli, to explore the interplay of  
298 emotional processes and self-related multisensory integration.

299 The retrospective questionnaire showed that participants were indeed experiencing the VR arm as  
300 “their own arm” significantly more during congruent than incongruent trials, and that the aversive  
301 stimulus (spider) was rated as significantly more “uncomfortable” and “scary”, and less “pleasant” than  
302 the neutral stimulus (car). Participants could also clearly discriminate between congruent and  
303 incongruent stimulation, and the tactile stimulation was experienced as rigorously temporally  
304 synchronized with the movement of the visual stimuli. In addition, the results of the control task also  
305 revealed that participants were able to hold their attention - as indexed by  $d'$ , consistently throughout  
306 all runs.

307 The fMRI results showed higher PPC activity during congruent (vs. incongruent) visuo-tactile  
308 stimulation, but neither in the EBA nor the PMv at a significance threshold of  $p < .001$ . Additionally,  
309 the aIns and visual areas showed higher activation during aversive (vs. neutral) visual stimulation,  
310 though neither the amygdala nor the ACC at a significance threshold of  $p < .001$ . Finally, testing for  
311 interaction effects of *Congruency*  $\times$  *Aversiveness* revealed higher amygdala and pregenual ACC  
312 activity during congruent and aversive trials, suggesting that the activation of the amygdala while  
313 viewing aversive stimuli depended on the success of the multisensory integration—and embodiment  
314 of the artificial limb.

315 Concerning the manipulation of congruency, the area 7A, corresponding to the posterior SPL, showed  
316 significantly higher activation when the direction of the tactile stimulation was congruent (vs.  
317 incongruent) with the direction of the visual movement. This result is in line with previous research  
318 showing that the posterior SPL is associated with visuo-tactile integration and encoding the internal  
319 representation of the body<sup>41-43</sup>. This suggest that the virtual arm was more integrated into the  
320 participant's own body representation during congruent visuo-tactile stimulation. However, we did not  
321 find a significant difference of activation in the EBA between congruent and incongruent conditions.

322 This could be due to the different set-ups between our experiment and previous RHI studies. Especially,  
323 in typical RHI paradigms, the fake arm is displaced from the real arm, whereas in ours, the VR arm  
324 was at the same visual location as the participants' real arm. In the former, this displacement creates a  
325 visuo-proprioceptive conflict, which has been linked to the activation of the EBA. The EBA is thought  
326 to be involved in the integration of the fake arm in the brain's internal visual body representation and  
327 its activity might largely reflect the process of minimizing the prediction error related to conflicting  
328 sensory (visual and proprioceptive) signals<sup>11,44</sup>. In the latter, there was potentially less visuo-  
329 proprioceptive conflict, thus no strong involvement of the EBA. Earlier studies have also revealed  
330 activation of the PMv, related to multisensory integration and preparation for action<sup>15,16</sup>. In our study,  
331 we did not find significant differences in PMv activity between the congruent and incongruent  
332 conditions. This could be due to the relatively short trial duration (2s), the visuo-tactile stimulation  
333 ending before the full onset of the RHI. Indeed, previous studies investigating the RHI typically applied  
334 stimulation for longer period of time (i.e., 30-35 seconds), and participants reported the start of the  
335 illusion 6 to 10 seconds after beginning stimulation<sup>45,44</sup>. In that context, Ehrsson and colleagues (2004)  
336 found that the PMv activity was associated with the after-onset period of the RHI (i.e., approx. 11s  
337 after the start of the stroking). Taken together, the questionnaire and these fMRI and results indicate  
338 that during the congruent condition, visual and tactile stimuli were more integrated than during the  
339 incongruent condition, consistent with previous studies of multisensory integration in the context of  
340 body ownership.

341 Concerning the manipulation of aversiveness, the aIns, which was previously linked to emotional  
342 processing<sup>18,46</sup>, showed higher activation during aversive (vs. neutral) visual stimulation. The aIns is  
343 thought to be a hub where the multiple sensory inputs, affective/motivational signals, and visceral  
344 information, converge and are integrated in order to detect salient stimuli<sup>47</sup>. More specifically, the area  
345 Id7 belong to the dorsal part of the aIns<sup>48</sup>. Along with dorsal ACC and amygdala, the dorsal aIns is  
346 part of the salience network, which is thought to enable the brain to select from the constant stream of  
347 sensory inputs, specific stimuli that are of cognitive, emotional and biological relevance<sup>49,50</sup>. Although  
348 we did not see differences in activation in ACC and amygdala, we interpret the activation of the dorsal  
349 aIns as evidence for the recruitment of this salience network in presence of the aversive stimulus.  
350 Therefore, in our case, the aversive stimulus could have been detected as salient, triggering an  
351 attentional reorienting in order to facilitate its processing<sup>49</sup>. This interpretation is also in line with the  
352 activations found in visual areas. The bilateral middle temporal area, comprising LOC and hMT+/V5,  
353 the fusiform gyrus and V1 showed significantly higher activations for the aversive conditions than for  
354 the neutral conditions. It has been shown that higher visual areas comprising LOC and V5 are more  
355 activated for aversive than neutral visual stimuli<sup>51</sup>, even when controlling for non-emotional potential  
356 confounds<sup>52</sup> (i.e., colors, visual complexity) or accounting for basic visual perception effects<sup>53</sup> (i.e.,  
357 face and scene perception). Moreover, the middle temporal and fusiform gyri were more activated in  
358 spider-phobic participants than in controls when viewing pictures of spider<sup>54,55</sup>. In support for a  
359 difference in aversiveness, we found that a sub region of the right LOC that was more activated in the  
360 aversive than neutral condition, was also reflecting the participant's affective ratings. However,  
361 although the two visual stimuli were designed to have identical movement characteristics (i.e., starting  
362 and finishing points, distance, speed), we cannot exclude that this higher activation during aversive  
363 trials may have resulted from the difference in quality of movement of the stimuli. Particularly,  
364 hMT+/V5 is thought to process visual and tactile motion direction<sup>56-58</sup>, and whereas the car moved  
365 along the arm without changing its shape, the spider's legs moved to simulate crawling. In addition to  
366 that, the aversive and neutral stimuli were not perfectly matched in terms of low-visual features (i.e.  
367 colors, shapes). Therefore, the activation in early visual regions (V1) found in the current study could  
368 be rather due to a difference in visual features between the two stimuli, and the activation in higher  
369 visual areas (fusiform gyrus, LOC, hMT+/V5) could be purely due to the difference of aversiveness.

370 To address this point, we conducted a control experiment with 23 participants, where the neutral  
371 stimulus was replaced by a (eight-legged) ladybug with the same color, shape and matching legs  
372 movements as the aversive stimulus (spider). We found virtually identical visual activations,  
373 particularly in LOC/hMT+/V5, which tend to confirm an emotional effect. However, this control study  
374 represents only a sub-sample and further investigation is needed. Altogether, even though we cannot  
375 exclude low-level visual and motion confounds being responsible for some of the difference in the  
376 brain activations found in the aversive vs. neutral contrast, our fMRI findings - the insula and visual  
377 areas, are in line with previous studies of emotional processing.

378 The main aim of the study was to investigate the interplay between emotional processing and  
379 multisensory integration, thus the Congruency  $\times$  Aversiveness effect. The choice of the stimuli in the  
380 present experiment was based on a previous study, which found activation of the amygdala when using  
381 a video of a spider as a (phylogenetic) threat stimuli with non-phobic participants<sup>59</sup>. Contrary to what  
382 we expected, the amygdala showed no higher activation during aversive trials (versus neutral). This  
383 could be due to habituation<sup>60,61</sup>, as participants repetitively saw the spider for a total of 144 trials (288  
384 seconds). Amygdala activity has been shown to be modulated by novelty of the emotional stimuli<sup>62</sup>  
385 and to decrease when participants are repeatedly exposed to spiders<sup>59,63</sup>. Importantly however, the  
386 contrast for the interaction between congruency and aversiveness revealed a significant effect on  
387 amygdala activity. In the congruent condition, there was increased activation in presence of the  
388 aversive stimulus (vs. neutral), but in the incongruent condition, it was the opposite. Furthermore, the  
389 amygdala was more strongly activated in the aversive-congruent condition than in the aversive-  
390 incongruent, and this difference of activation was greater than the one seen in the case of the neutral  
391 stimulus. This suggests that the effect of aversiveness depended on the strength of visual-tactile  
392 integration. This pattern could be linked to threat detection and selective attention<sup>64</sup>. The modulation  
393 of attention and the increased response in the visual regions due to emotional stimuli is thought to be  
394 modulated by the amygdala<sup>65</sup>. Previous research has shown that evolutionarily fear-relevant stimuli  
395 (including spiders) were detected more quickly (vs. neutral) among distractor stimuli<sup>66</sup>, and that the  
396 amygdala might mediate the capturing of attention when a threat is detected<sup>67</sup>. Indeed, in healthy  
397 participants, attentional blink (i.e., an impairment in the detection of a target if another stimulus  
398 precedes it too closely in time) is reduced in the presence of aversive stimuli (vs. neutral), but not in  
399 patients with bilateral damage to the amygdala<sup>68</sup>, indicating that the amygdala plays an important role  
400 in the affective modulation of perceptual sensitivity. Therefore, in the context of our study, the spider  
401 may have captured participants' attention and enhanced perception of the aversive stimulus when the  
402 VR arm was perceived more strongly as part of their body, that is, when the stimulus represented a  
403 more relevant threat to the bodily self<sup>69</sup>. Finally, the right pregenual ACC showed an interaction  
404 effect. The activation was small, close to the ventricles and does not correspond to dorsal ACC, thus  
405 not confirming our main hypothesis. In summary, we found that amygdala activity in response to an  
406 affective stimulus is influenced by the strength of multisensory integration underlying body ownership.  
407 This may suggest enhanced perception of aversive stimuli when they represent a threat to the body  
408 integrity.

#### 409 **4.1 Conclusion**

410 Using a novel, fully automated VR fMRI setup, the interaction between emotion and multisensory  
411 integration underlying body ownership was investigated. The PPC showed higher activity during  
412 congruent (vs. incongruent) visuo-tactile stimulation. Further, the aIns and visual areas showed higher  
413 activation with aversive (vs. neutral) stimuli. Finally, and most importantly, an interaction effect of  
414 Congruency  $\times$  Aversiveness was seen in the amygdala, such that activation was stronger for aversive

415 stimuli (vs. neutral) when there was stronger multisensory integration of body-related information; that  
416 is, when the virtual arm may be more strongly integrated into the bodily representation of the self.

#### 417 **Data availability**

418 The dataset generated and analyzed during the current study is available from the corresponding  
419 author on reasonable request.

#### 420 **References**

- 421 1. Macaluso, E. & Driver, J. *Multisensory spatial interactions: A window onto functional*  
422 *integration in the human brain. Trends in Neurosciences* vol. 28 (2005).
- 423 2. Blanke, O. *Multisensory brain mechanisms of bodily self-consciousness. Nature Reviews*  
424 *Neuroscience* vol. 13 (2012).
- 425 3. Rohe, T. & Noppeney, U. Cortical Hierarchies Perform Bayesian Causal Inference in  
426 Multisensory Perception. *PLoS Biol.* **13**, (2015).
- 427 4. Kilteni, K., Maselli, A., Kording, K. P. & Slater, M. Over my fake body: body ownership  
428 illusions for studying the multisensory basis of own-body perception. *Front. Hum. Neurosci.*  
429 (2015) doi:10.3389/fnhum.2015.00141.
- 430 5. Samad, M., Chung, A. J. & Shams, L. Perception of body ownership is driven by Bayesian  
431 sensory inference. *PLoS ONE* (2015) doi:10.1371/journal.pone.0117178.
- 432 6. Botvinick, M. & Cohen, J. Rubber hands ‘feel’ touch that eyes see [8]. *Nature* (1998)  
433 doi:10.1038/35784.
- 434 7. Ehrsson, H. H. The Concept of Body Ownership and Its Relation to Multisensory Integration. in  
435 *The New Handbook of Multisensory Processes* (2012).
- 436 8. Tsakiris, M. & Haggard, P. The rubber hand illusion revisited: Visuotactile integration and self-  
437 attribution. *J. Exp. Psychol. Hum. Percept. Perform.* (2005) doi:10.1037/0096-1523.31.1.80.
- 438 9. Bekrater-Bodmann, R. *et al.* The importance of synchrony and temporal order of visual and  
439 tactile input for illusory limb ownership experiences - An fMRI study applying virtual reality.  
440 *PLoS ONE* (2014) doi:10.1371/journal.pone.0087013.
- 441 10. Ehrsson, H. H., Spence, C. & Passingham, R. E. That’s my hand! Activity in premotor cortex  
442 reflects feeling of ownership of a limb. *Science* **305**, 875–877 (2004).
- 443 11. Limanowski, J. & Blankenburg, F. Network activity underlying the illusory self-attribution of a  
444 dummy arm. *Hum. Brain Mapp.* (2015) doi:10.1002/hbm.22770.
- 445 12. Brozzoli, C., Gentile, G. & Ehrsson, H. H. That’s Near My Hand! Parietal and Premotor Coding  
446 of Hand-Centered Space Contributes to Localization and Self-Attribution of the Hand. *J.*  
447 *Neurosci.* (2012) doi:10.1523/JNEUROSCI.2660-12.2012.
- 448 13. Heed, T., Backhaus, J. & Röder, B. Integration of hand and finger location in external spatial  
449 coordinates for tactile localization. *J. Exp. Psychol. Hum. Percept. Perform.* **38**, 386–401 (2012).
- 450 14. Heed, T., Buchholz, V. N., Engel, A. K. & Röder, B. Tactile remapping: from coordinate  
451 transformation to integration in sensorimotor processing. *Trends Cogn. Sci.* **19**, 251–258 (2015).
- 452 15. Zimmermann, M., Meulenbroek, R. G. J. & De Lange, F. P. Motor planning is facilitated by  
453 adopting an action’s goal posture: An fMRI study. *Cereb. Cortex* **22**, 122–131 (2012).

454



- 455 16. Barany, D. A., Della-Maggiore, V., Viswanathan, S., Cieslak, M. & Grafton, S. T. Feature  
456 Interactions Enable Decoding of Sensorimotor Transformations for Goal-Directed Movement. *J.*  
457 *Neurosci.* (2014) doi:10.1523/JNEUROSCI.5173-13.2014.
- 458 17. Craig, A. D. How do you feel? Interoception: The sense of the physiological condition of the  
459 body. *Nat. Rev. Neurosci.* **3**, 655–666 (2002).
- 460 18. Medford, N. & Critchley, H. D. Conjoint activity of anterior insular and anterior cingulate cortex:  
461 Awareness and response. *Brain Struct. Funct.* **214**, 535–549 (2010).
- 462 19. Ehrsson, H. H., Wiech, K., Weiskopf, N., Dolan, R. J. & Passingham, R. E. Threatening a rubber  
463 hand that you feel is yours elicits a cortical anxiety response. *Proc. Natl. Acad. Sci. U. S. A.* **104**,  
464 9828–9833 (2007).
- 465 20. LeDoux, J. The amygdala. *Current Biology* (2007) doi:10.1016/j.cub.2007.08.005.
- 466 21. Peelen, M. V., Atkinson, A. P., Andersson, F. & Vuilleumier, P. Emotional modulation of body-  
467 selective visual areas. *Soc. Cogn. Affect. Neurosci.* **2**, 274–283 (2007).
- 468 22. Lenggenhager, B., Tadi, T., Metzinger, T. & Blanke, O. Video ergo sum: Manipulating bodily  
469 self-consciousness. *Science* **317**, 1096–1099 (2007).
- 470 23. Maselli, A., Kilteni, K., López-Moliner, J. & Slater, M. The sense of body ownership relaxes  
471 temporal constraints for multisensory integration. *Sci. Rep.* **6**, (2016).
- 472 24. Mueller, C. *et al.* Building virtual reality fMRI paradigms: A framework for presenting  
473 immersive virtual environments. *J. Neurosci. Methods* **209**, 290–298 (2012).
- 474 25. Reggente, N. *et al.* Enhancing the ecological validity of fMRI memory research using virtual  
475 reality. *Frontiers in Neuroscience* vol. 12 (2018).
- 476 26. Riva, G. *et al.* Affective interactions using virtual reality: The link between presence and  
477 emotions. *Cyberpsychol. Behav.* **10**, 45–56 (2007).
- 478 27. Price, M., Mehta, N., Tone, E. B. & Anderson, P. L. Does engagement with exposure yield better  
479 outcomes? Components of presence as a predictor of treatment response for virtual reality  
480 exposure therapy for social phobia. *J. Anxiety Disord.* **25**, 763–770 (2011).
- 481 28. Diemer, J., Alpers, G. W., Pepercorn, H. M., Shiban, Y. & Mühlberger, A. The impact of  
482 perception and presence on emotional reactions: a review of research in virtual reality. *Front.*  
483 *Psychol.* **6**, (2015).
- 484 29. Gaebler, M. *et al.* Stereoscopic depth increases intersubject correlations of brain networks.  
485 *NeuroImage* **100**, 427–434 (2014).
- 486 30. Lorenzetti, V. *et al.* Emotion regulation using virtual environments and real-time fMRI  
487 neurofeedback. *Front. Neurol.* **9**, (2018).
- 488 31. Davey, G. C. L. Characteristics of individuals with fear of spiders. *Anxiety Res.* **4**, 299–314  
489 (1991).
- 490 32. Oldfield, R. C. The assessment and analysis of handedness: The Edinburgh inventory.  
491 *Neuropsychologia* **9**, 97–113 (1971).
- 492 33. Macey, P. M., Macey, K. E., Kumar, R. & Harper, R. M. A method for removal of global effects  
493 from fMRI time series. *NeuroImage* **22**, 360–366 (2004).
- 494 34. Kleiner, M. *et al.* What’s new in psychtoolbox-3. *Perception* **36**, 1–16 (2007).

- 495 35. Dodgson, N. A. Variation and extrema of human interpupillary distance. in *Stereoscopic*  
496 *Displays and Virtual Reality Systems XI* vol. 5291 36–46 (International Society for Optics and  
497 Photonics, 2004).
- 498 36. Ashburner, J. A fast diffeomorphic image registration algorithm. *NeuroImage* **38**, 95–113 (2007).
- 499 37. Behzadi, Y., Restom, K., Liao, J. & Liu, T. T. A component based noise correction method  
500 (CompCor) for BOLD and perfusion based fMRI. *NeuroImage* **37**, 90–101 (2007).
- 501 38. Eickhoff, S. B. *et al.* A new SPM toolbox for combining probabilistic cytoarchitectonic maps and  
502 functional imaging data. *NeuroImage* **25**, 1325–1335 (2005).
- 503 39. Macmillan, N. A. & Kaplan, H. L. Detection Theory Analysis of Group Data. Estimating  
504 Sensitivity From Average Hit and False-Alarm Rates. *Psychol. Bull.* **98**, 185–199 (1985).
- 505 40. Stanislaw, H. & Todorov, N. Calculation of signal detection theory measures. *Behav. Res.*  
506 *Methods Instrum. Comput.* **31**, 137–149 (1999).
- 507 41. Wolpert, D. M., Goodbody, S. J. & Husain, M. Maintaining internal representations: The role of  
508 the human superior parietal lobe. *Nat. Neurosci.* **1**, 529–533 (1998).
- 509 42. Graziano, M. & Botvinick, M. M. How the brain represents the body: Insights from  
510 neurophysiology and psychology. *Atten. Perform. Vol XIX Common Mech. Percept. Action* 136–  
511 157 (2002).
- 512 43. Limanowski, J. & Blankenburg, F. Integration of visual and proprioceptive limb position  
513 information in human posterior parietal, premotor, and extrastriate cortex. *J. Neurosci.* **36**, 2582–  
514 2589 (2016).
- 515 44. Limanowski, J., Lutti, A. & Blankenburg, F. The extrastriate body area is involved in illusory  
516 limb ownership. *NeuroImage* **86**, 514–524 (2014).
- 517 45. Petkova, V. I. *et al.* From part- to whole-body ownership in the multisensory brain. *Curr. Biol.*  
518 **21**, 1118–1122 (2011).
- 519 46. Craig, A. D. *How do you feel - now? The anterior insula and human awareness. Nature Reviews*  
520 *Neuroscience* vol. 10 (2009).
- 521 47. Menon, V. & Uddin, L. Q. Saliency, switching, attention and control: a network model of insula  
522 function. *Brain Struct. Funct.* **214**, 655–667 (2010).
- 523 48. Grodzinsky, Y. *et al.* Logical negation mapped onto the brain. *Brain Struct. Funct.* **225**, 19–31  
524 (2020).
- 525 49. Menon, V. Salience Network. in *Brain Mapping: An Encyclopedic Reference* vol. 2 597–611  
526 (2015).
- 527 50. Seeley, W. W. The Salience Network: A Neural System for Perceiving and Responding to  
528 Homeostatic Demands. *J. Neurosci. Off. J. Soc. Neurosci.* **39**, 9878–9882 (2019).
- 529 51. Garrett, A. S. & Maddock, R. J. Separating subjective emotion from the perception of emotion-  
530 inducing stimuli: An fMRI study. *NeuroImage* **33**, 263–274 (2006).
- 531 52. Taylor, S. F., Liberzon, I. & Koeppe, R. A. The effect of graded aversive stimuli on limbic and  
532 visual activation. *Neuropsychologia* **38**, 1415–1425 (2000).
- 533 53. Sabatinelli, D. *et al.* Emotional perception: Meta-analyses of face and natural scene processing.  
534 *NeuroImage* **54**, 2524–2533 (2011).

- 535 54. Dilger, S. *et al.* Brain activation to phobia-related pictures in spider phobic humans: An event-  
536 related functional magnetic resonance imaging study. *Neurosci. Lett.* **348**, 29–32 (2003).
- 537 55. Schienle, A., Schäfer, A., Walter, B., Stark, R. & Vaitl, D. Brain activation of spider phobics  
538 towards disorder-relevant, generally disgust- and fear-inducing pictures. *Neurosci. Lett.* **388**, 1–6  
539 (2005).
- 540 56. Grossman, E. *et al.* Brain areas involved in perception of biological motion. *J. Cogn. Neurosci.*  
541 **12**, 711–720 (2000).
- 542 57. Hagen, M. C. *et al.* Tactile motion activates the human middle temporal/V5 (MT/V5) complex.  
543 *Eur. J. Neurosci.* **16**, 957–964 (2002).
- 544 58. Van Kemenade, B. M. *et al.* Tactile and visual motion direction processing in hMT+/V5.  
545 *NeuroImage* **84**, 420–427 (2014).
- 546 59. Mobbs, D. *et al.* Neural activity associated with monitoring the oscillating threat value of a  
547 tarantula. *Proc. Natl. Acad. Sci. U. S. A.* **107**, 20582–20586 (2010).
- 548 60. Breiter, H. C. *et al.* Response and Habituation of the Human Amygdala during Visual Processing  
549 of Facial Expression. *Neuron* **17**, 875–887 (1996).
- 550 61. Paquette, V. *et al.* ‘Change the mind and you change the brain’: Effects of cognitive-behavioral  
551 therapy on the neural correlates of spider phobia. *NeuroImage* **18**, 401–409 (2003).
- 552 62. Weierich, M. R., Wright, C. I., Negreira, A., Dickerson, B. C. & Barrett, L. F. Novelty as a  
553 dimension in the affective brain. *NeuroImage* **49**, 2871–2878 (2010).
- 554 63. Björkstrand, J. *et al.* Decrease in amygdala activity during repeated exposure to spider images  
555 predicts avoidance behavior in spider fearful individuals. *Transl. Psychiatry* **10**, 1–10 (2020).
- 556 64. Bishop, S. J. Neural Mechanisms Underlying Selective Attention to Threat. *Ann. N. Y. Acad. Sci.*  
557 **1129**, 141–152 (2008).
- 558 65. Vuilleumier, P. How brains beware: neural mechanisms of emotional attention. *Trends Cogn. Sci.*  
559 **9**, 585–594 (2005).
- 560 66. Öhman, A., Flykt, A. & Esteves, F. Emotion drives attention: Detecting the snake in the grass. *J.*  
561 *Exp. Psychol. Gen.* **130**, 466–478 (2001).
- 562 67. Öhman, A. The role of the amygdala in human fear: Automatic detection of threat.  
563 *Psychoneuroendocrinology* **30**, 953–958 (2005).
- 564 68. Anderson, A. K. & Phelps, E. A. Lesions of the human amygdala impair enhanced perception of  
565 emotionally salient events. *Nature* **411**, 305–309 (2001).
- 566 69. Sander, D., Grafman, J. & Zalla, T. The human amygdala: an evolved system for relevance  
567 detection. *Rev. Neurosci.* **14**, 303–316 (2003).
- 568

569 **5 Acknowledgements (optional)**

570 **6 Author contributions (names must be given as initials)**

571 AF – Conceptualization, Methodology, Data collection, Data analysis, Writing – original draft,  
572 figures, review & editing

573 TTS – Supervision, Conceptualization, Data collection, Writing – review & editing

574 TN – Methodology, Data collection, Writing – review & editing

575 FB – Supervision, Conceptualization, Writing – review & editing, Funding acquisition

576 **7 Additional Information (including a Competing Interests Statement)**

577 **Competing interests**

578 The authors declare no competing interests.

579 **Link to the 3D assets used for this study**

580 • **Spider:** [https://assetstore.unity.com/packages/3d/characters/creatures/free-fantasy-spider-](https://assetstore.unity.com/packages/3d/characters/creatures/free-fantasy-spider-10104)  
581 10104

582 • **Car:** <https://assetstore.unity.com/packages/3d/vehicles/land/retro-cartoon-cars-cicada-96158>

583 • **Arm:** [https://assetstore.unity.com/packages/3d/characters/humanoids/vr-hands-and-fp-arms-](https://assetstore.unity.com/packages/3d/characters/humanoids/vr-hands-and-fp-arms-pack-77815)  
584 pack-77815

585 • **Room:** <https://assetstore.unity.com/packages/3d/environments/morgue-room-pbr-65817>
